# Supplementary material for: RETRACTED ARTICLE: Ulinastatin attenuates renal fibrosis by regulating AMPK/HIF-1α signaling pathway-mediated glycolysis
Source: PubMed Central journal article supplement — Sci Rep. 2024 Nov 14;14:28032. doi: 10.1038/s41598-024-78092-0 (PMC11564816; doi:10.1038/s41598-024-78092-0), 2024-11-14

# Ulinastatin attenuates renal fibrosis by regulating AMPK/HIF-1 $\alpha$ signaling pathway-mediated glycolysis

## Original western blot

**Supplementary Fig.1 Original western blot for three repeats**

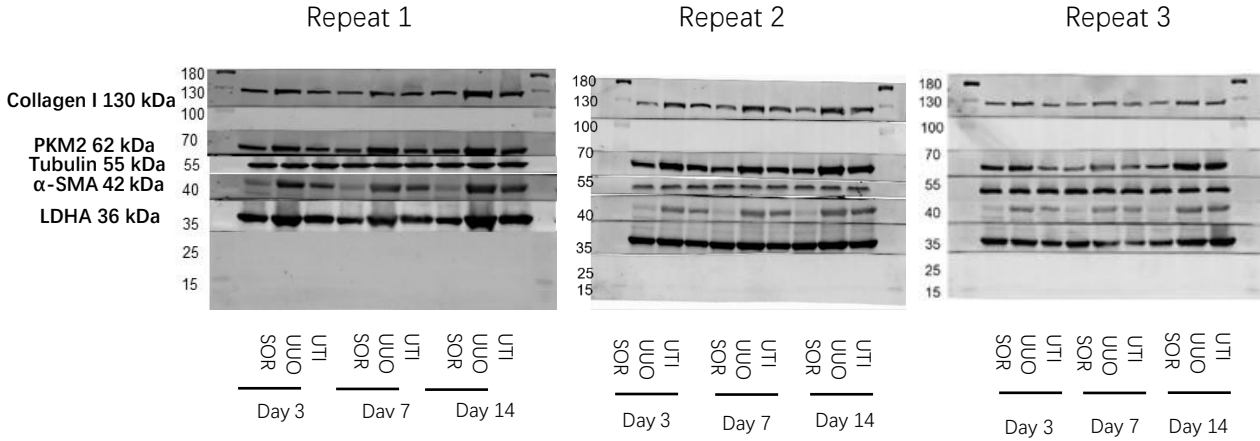

**Supplementary Fig.2. Original western blot for three repeats**

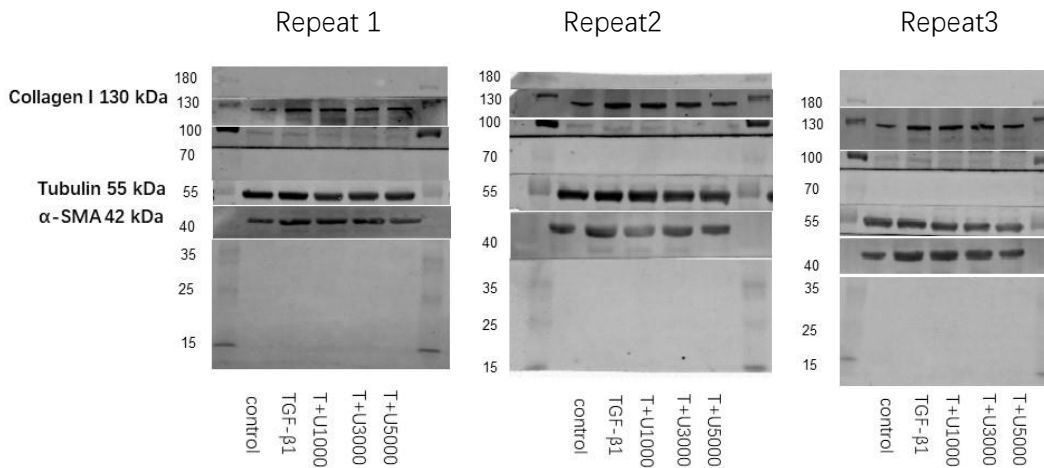

**Supplementary Fig.3 Original western blot for three repeats**

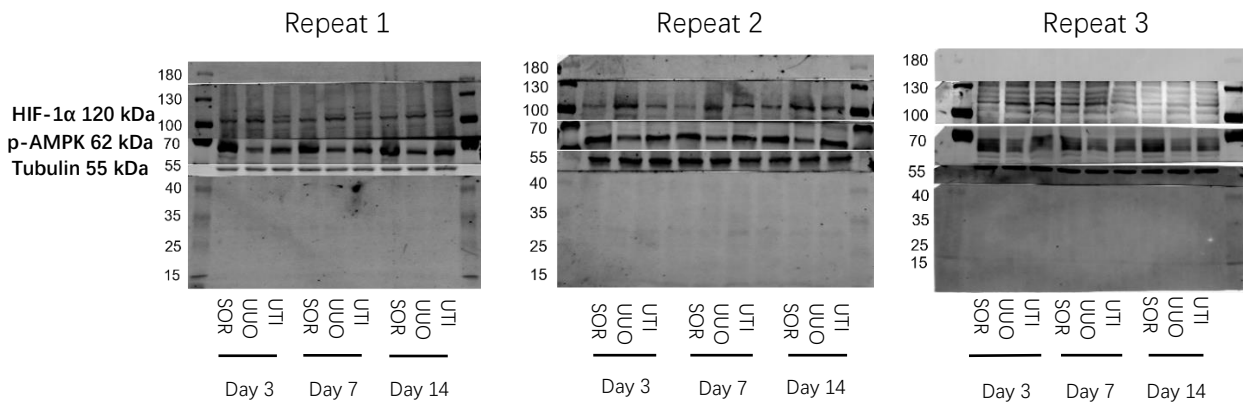

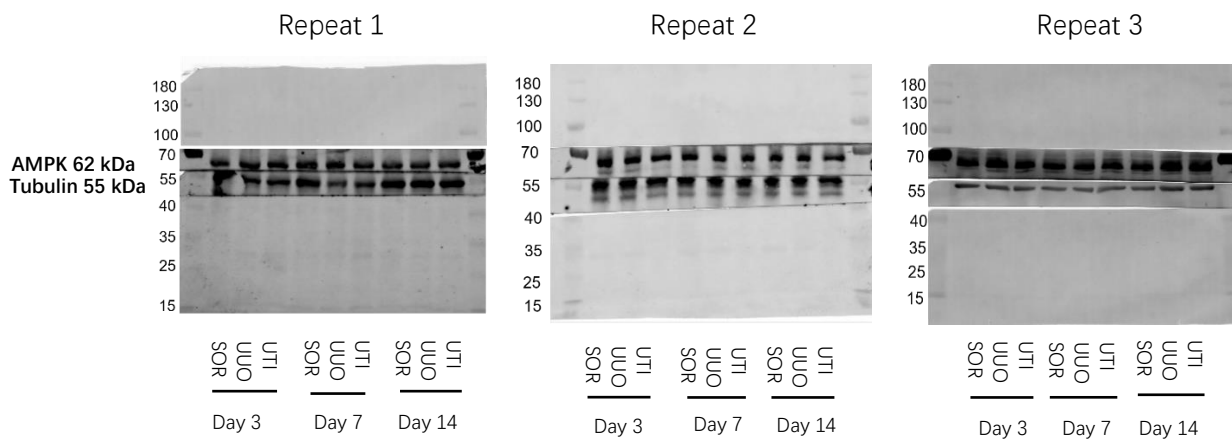

**Supplementary Fig.4. Original western blot for three repeats**

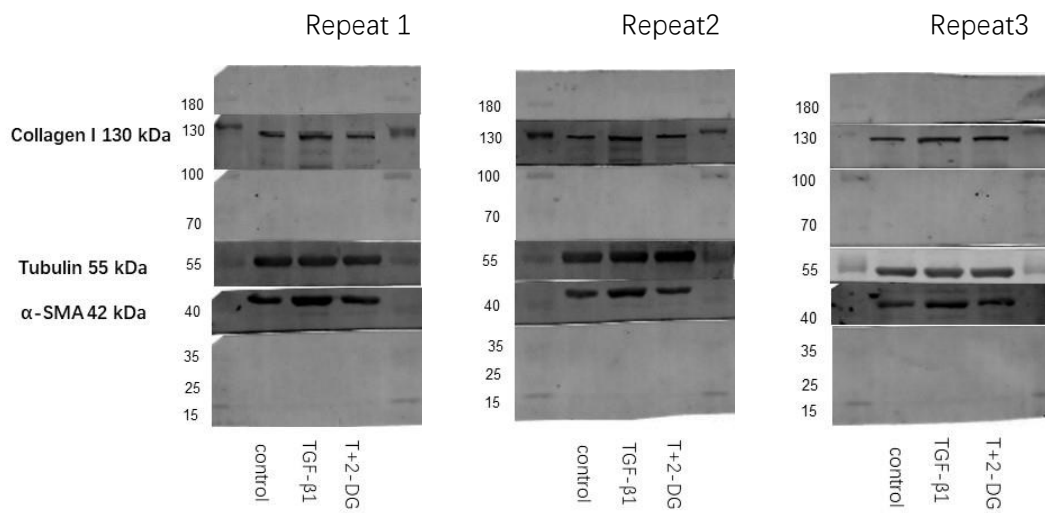

**Supplementary Fig.5. Original western blot for three repeats**

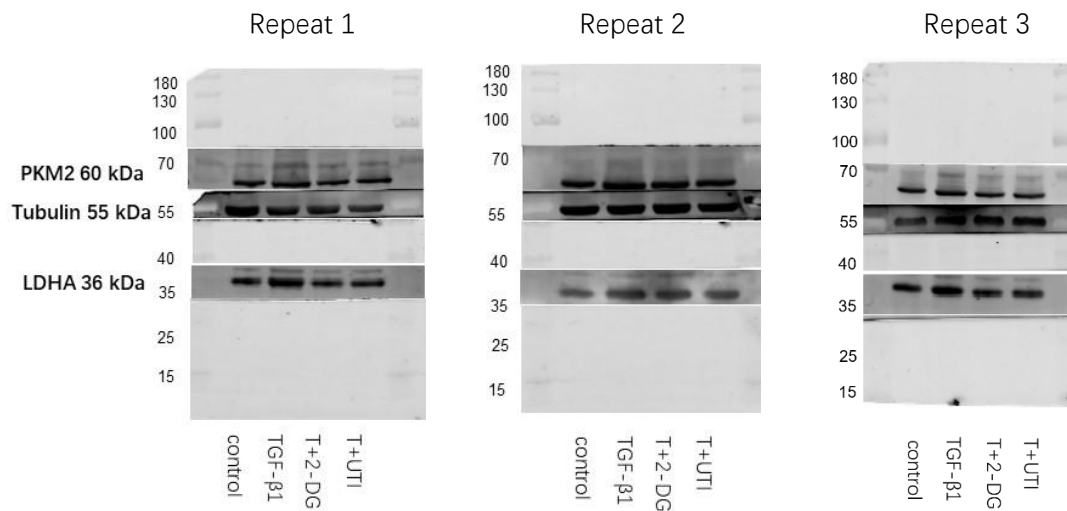

**Supplementary Fig.6. Original western blot for three repeats**

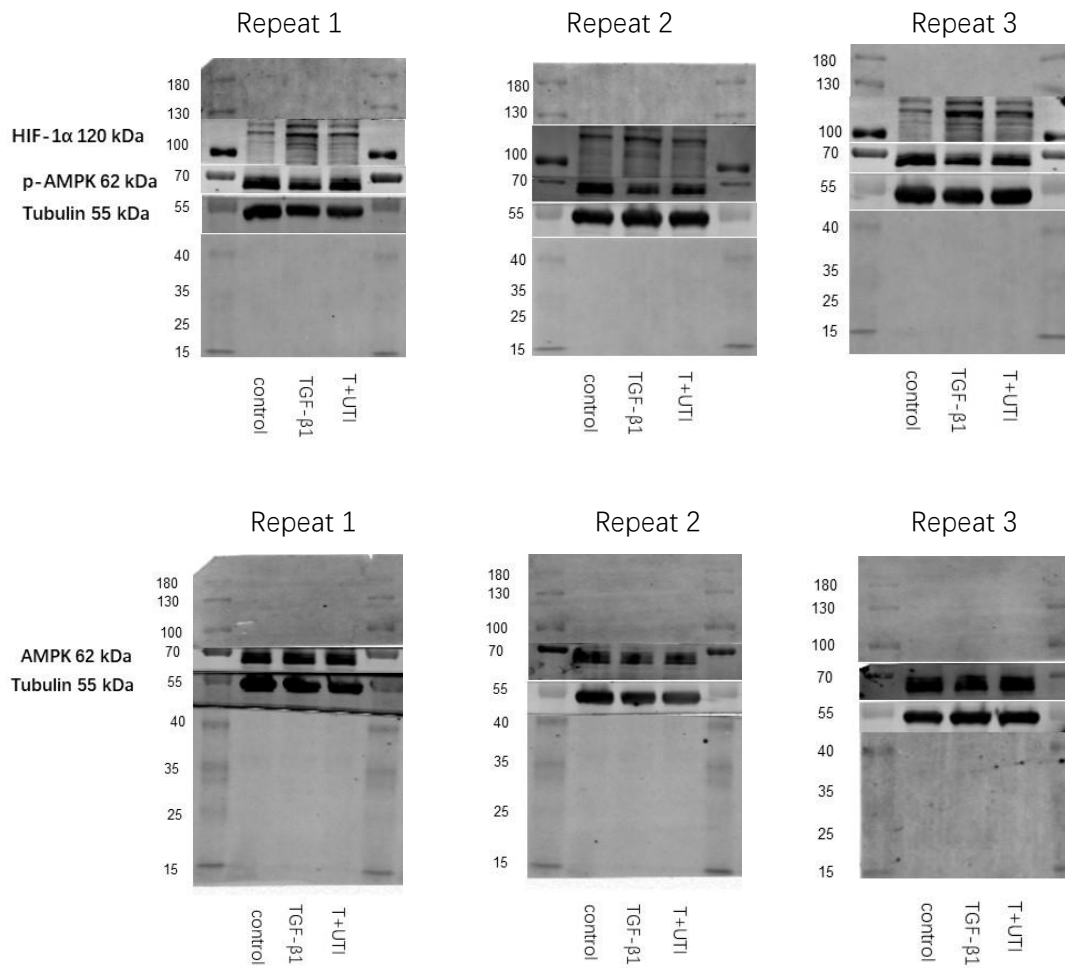

**Supplementary Fig.7. Original western blot for three repeats**

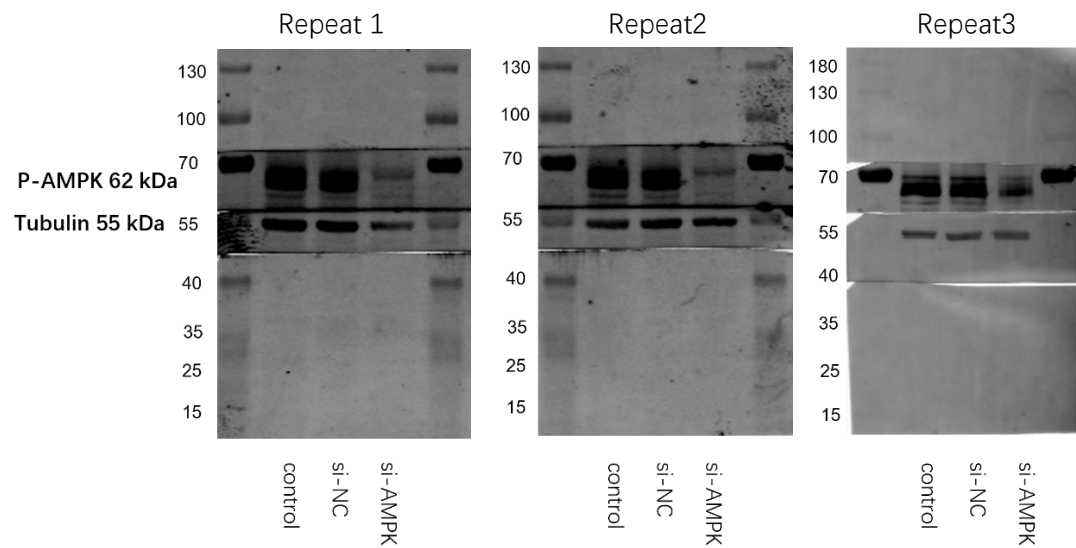

**Supplementary Fig.8. Original western blot for three repeats**

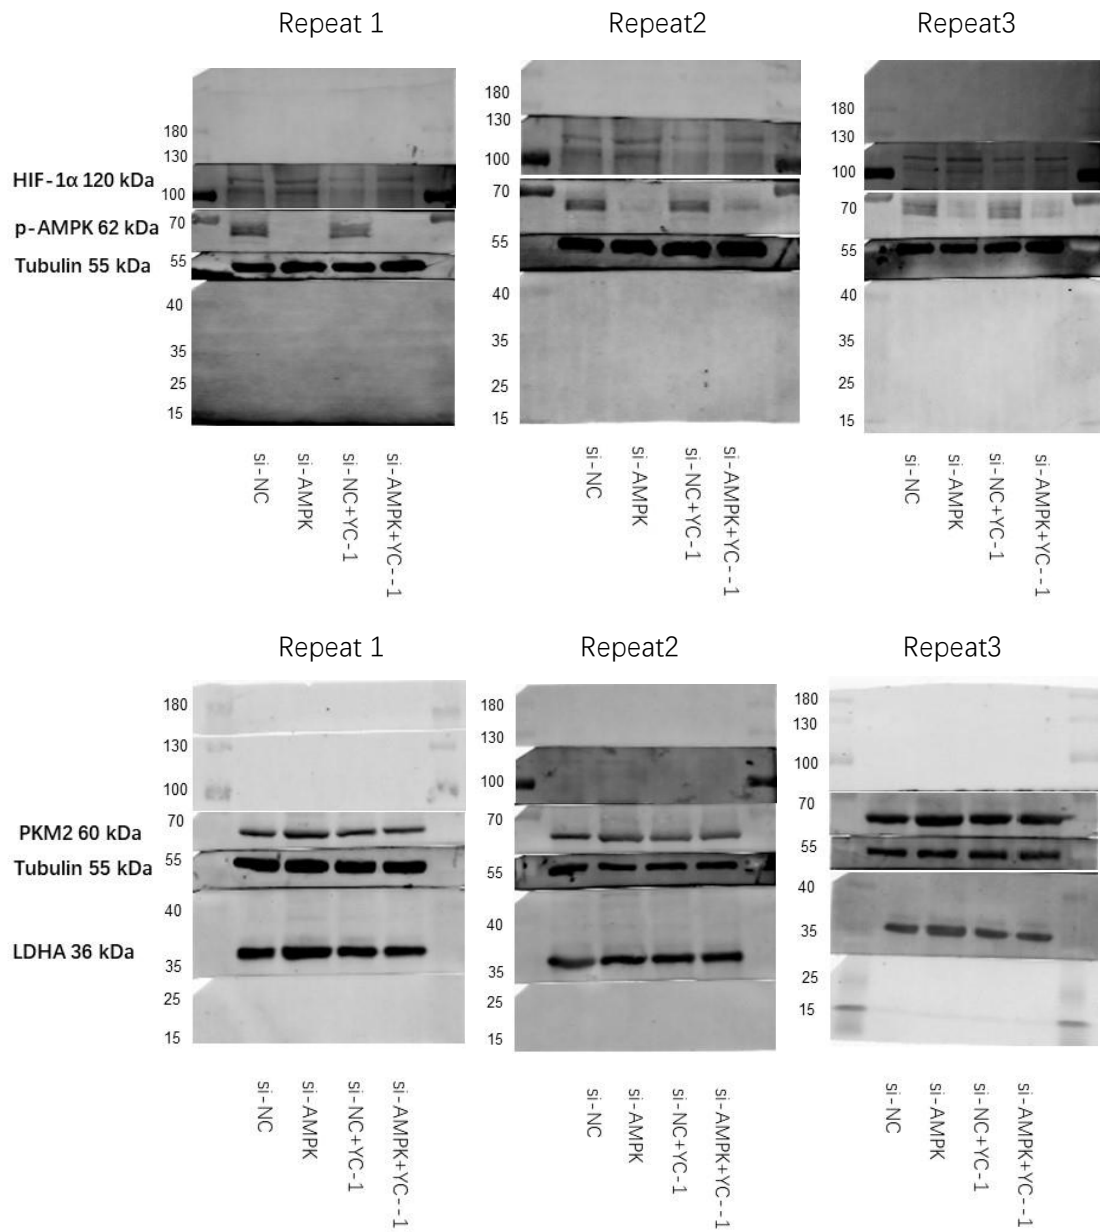

**Supplementary Fig.9. Original western blot for three repeats**

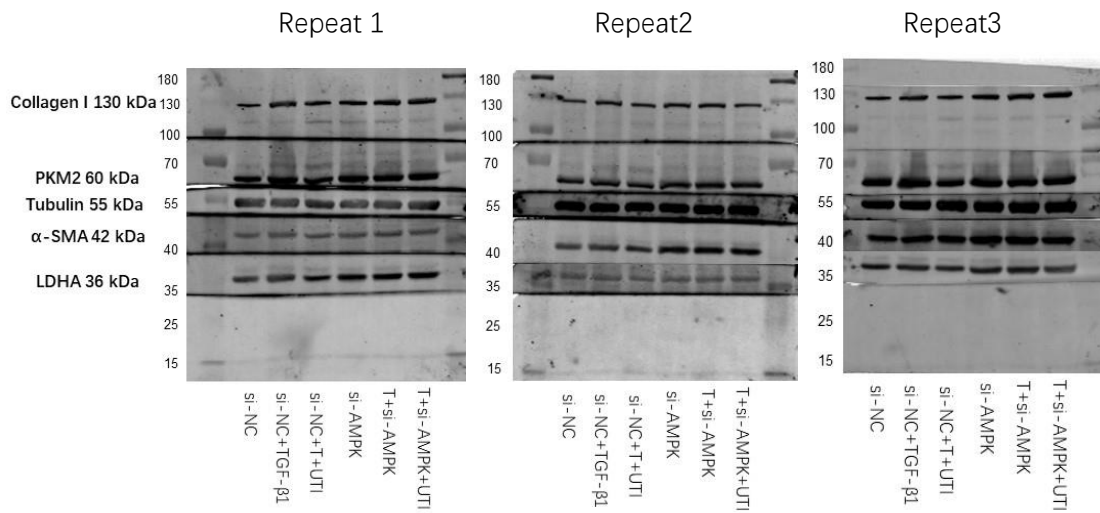

**Supplementary Fig.10. Original western blot for three repeats**

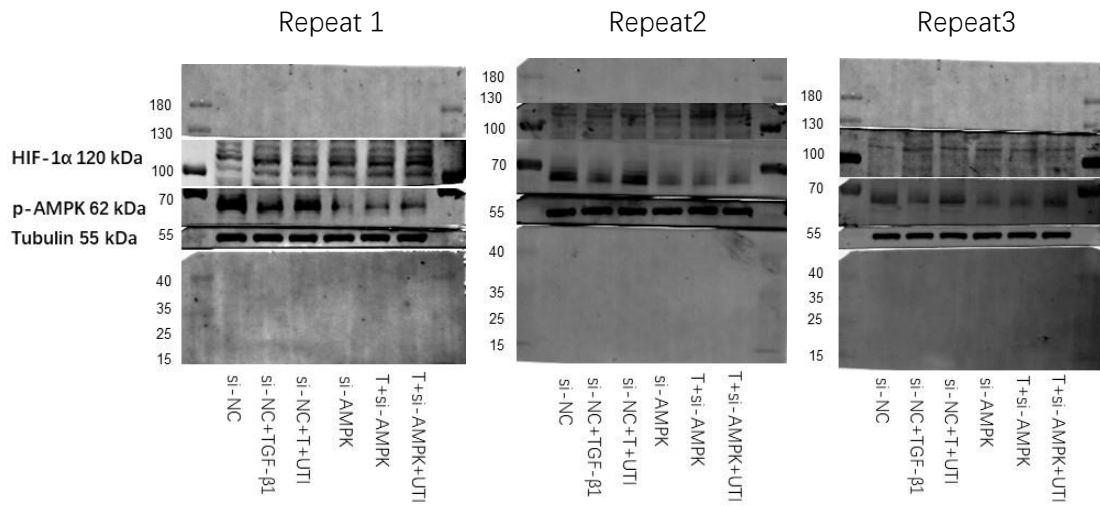

Supplement: 41598_2024_78092_MOESM1_ESM.pdf [file 41598_2024_78092_MOESM1_ESM.pdf]
